# Supplementary material
Source: publisher figshare collection journal article supplement (https://frontiersin.figshare.com/ndownloader/files/10884287)
Supplement: Supplementary file [file 10884287]

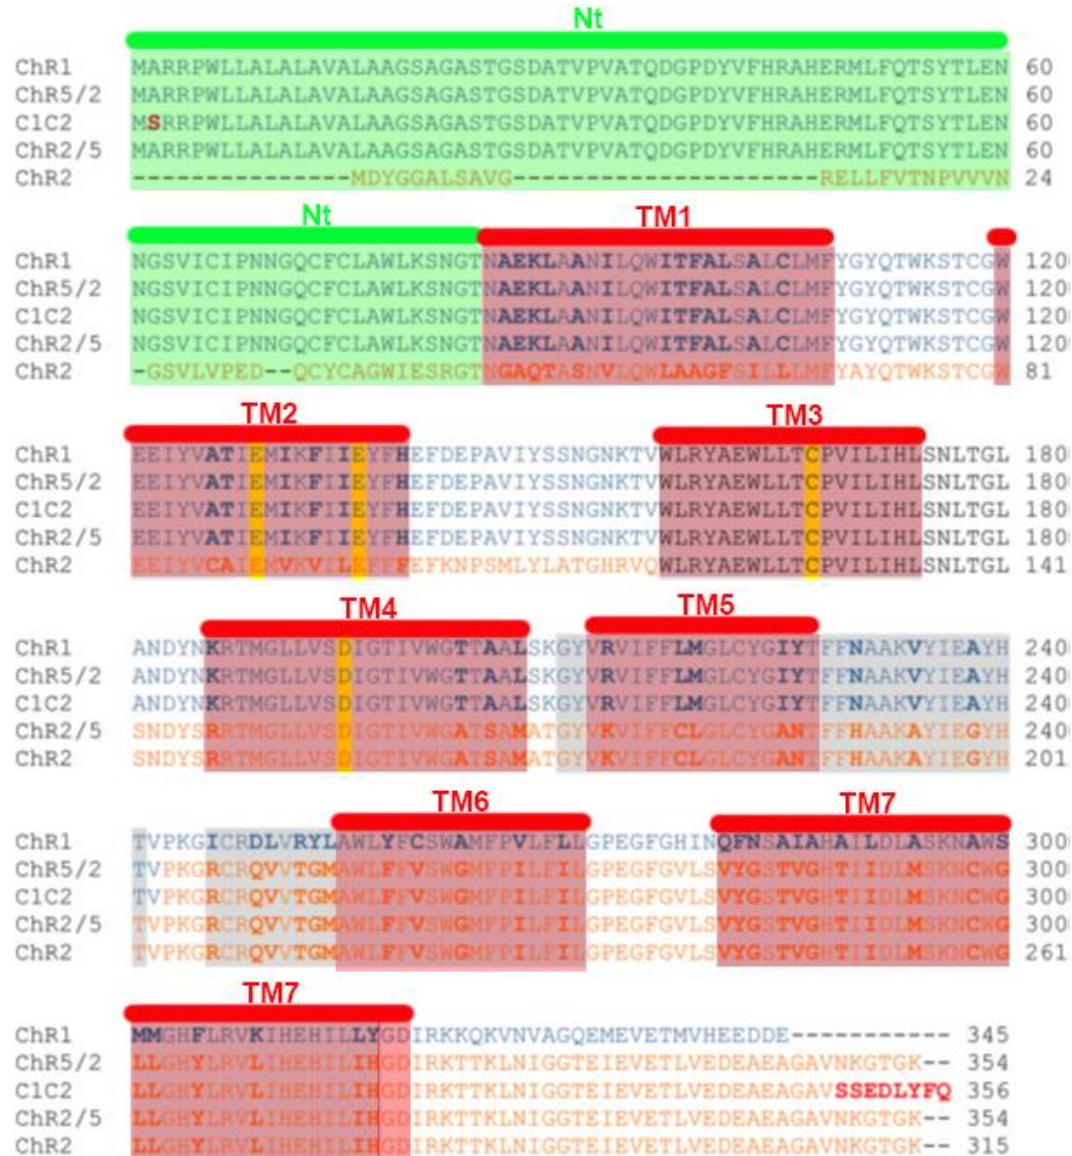

**Figure S1.** Sequence alignment of ChR1, ChR2 and the chimeras (ChR5/2, ChR2/5, and C1C2). The figure was quoted from the research (Inaguma et al., 2015). Nt: N terminus (green); TM: transmembrane domains (red).
